# Supplementary material
Source: Springer Nature journal article supplement (https://www.springermedizin.de/resource/supplementary/12943_2014_1314_MOESM4_ESM.pdf/9552708)
Supplement: MOESM4 [file 9552708]

**A**Primary AML cells (*n* = 31)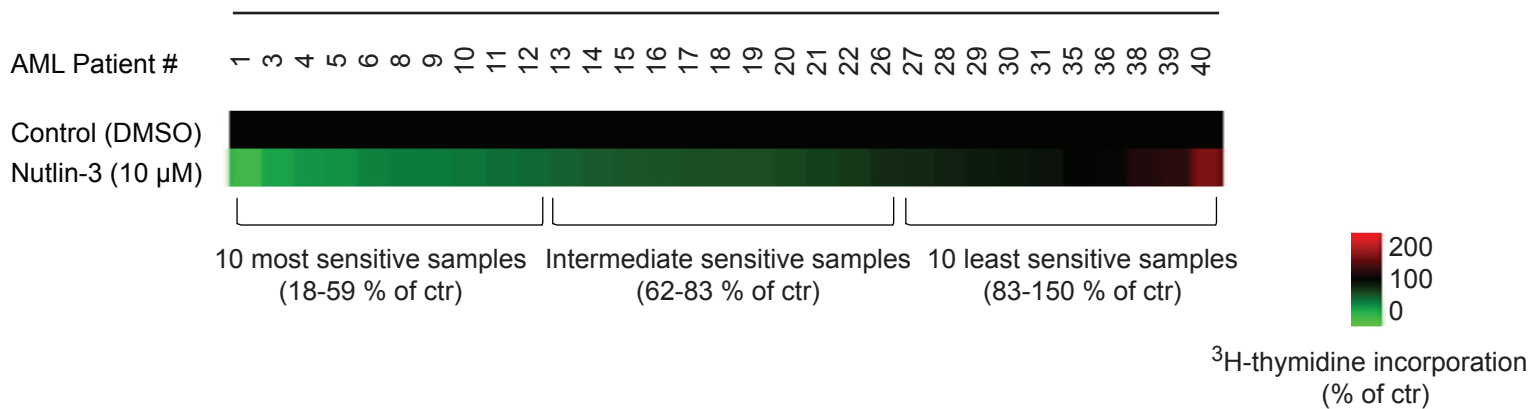**B**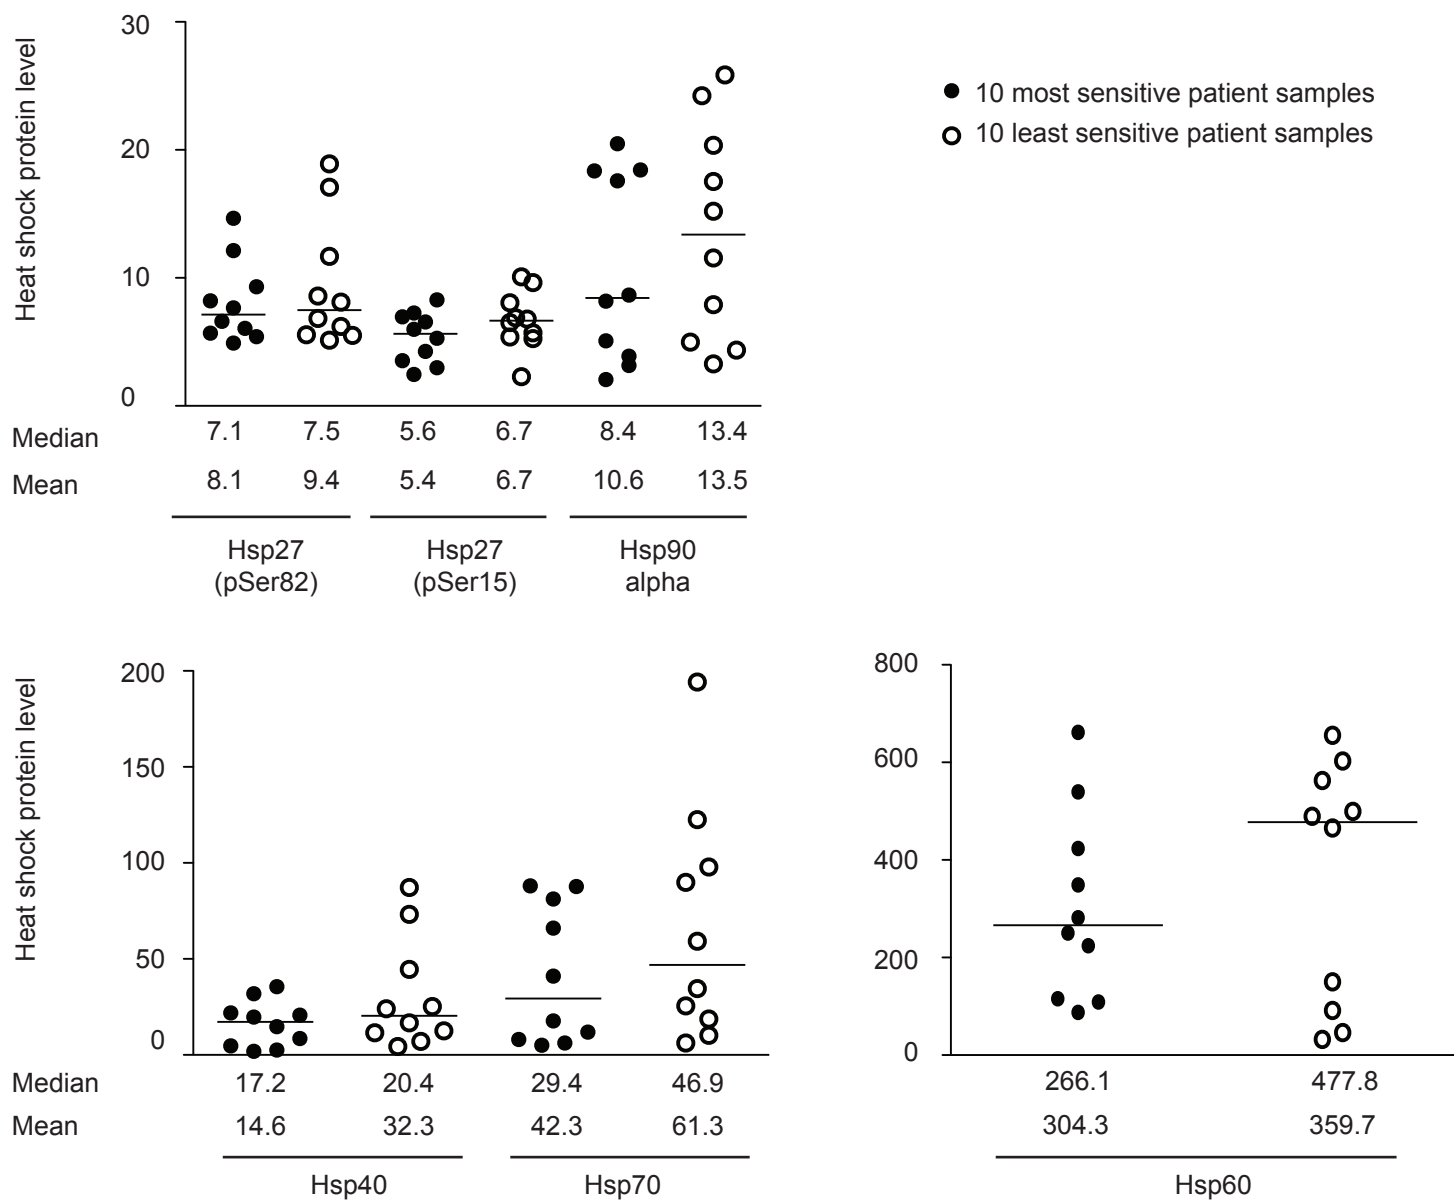

**Supplementary Figure 1. Intracellular heat shock protein levels and sensitivity to nutlin-3 in primary AML cells with wild type TP53.** (A) Sensitivity to nutlin-3 (10  $\mu$ M, 24 hours) in 31 primary AML samples with wild type TP53 was determined by  $^3$ H-thymidine incorporation assay, and samples were analyzed in triplicates. Intracellular levels of heat shock proteins Hsp27 (phospho-Ser82), Hsp27 (phospho-Ser15), Hsp40, Hsp60, Hsp70 and Hsp90 $\alpha$  for all samples were determined using Hsp/Chaperone 8-plex MultiBead kit and flow cytometric analysis. Samples were analyzed in duplicates. (B) Median values of heat shock protein levels were determined for patient samples that were sensitive (10 most sensitive ranging from 18-59% viability of control) and non-sensitive (10 least sensitive ranging from 83-above 100% viability of control) to nutlin-3, and are shown in the figure together with values for individual patient samples. Mean values are given below. For Hsp27 (phospho-Ser82) and Hsp27 (phospho-Ser15) levels are given as u/ml; for Hsp40, Hsp60, Hsp70 and Hsp90 $\alpha$  levels are given as ng/ml.
